# Supplementary material for: ‘All That Glitters Is Not Gold’: High-Resolution Crystal Structures of Ligand-Protein Complexes Need Not Always Represent Confident Binding Poses
Source: MDPI journal article supplement (doi:10.3390/ijms22136830), 2021-06-25
Supplement: s1 [file s1]

***'All that glitters is not gold': High-resolution crystal structures of ligand-protein complexes need not always represent confident binding poses.***

Sohini Chakraborti<sup>1</sup>, Kaushik Hatti<sup>2</sup>, Narayanaswamy Srinivasan<sup>1\*</sup>

<sup>1</sup>Molecular Biophysics Unit, Indian Institute of Science, Bengaluru, Karnataka 560012, India

<sup>2</sup>Drug Discovery Unit, Wellcome Centre for Anti-Infectives Research, School of Life Sciences, University of Dundee, Dow Street, Dundee. DDI 5EH, U.K

\*Correspondence: [ns@iisc.ac.in](mailto:ns@iisc.ac.in); Telephone: +91-80-22932837; Fax: +91-80-23600535.

**Supplementary Figures:**

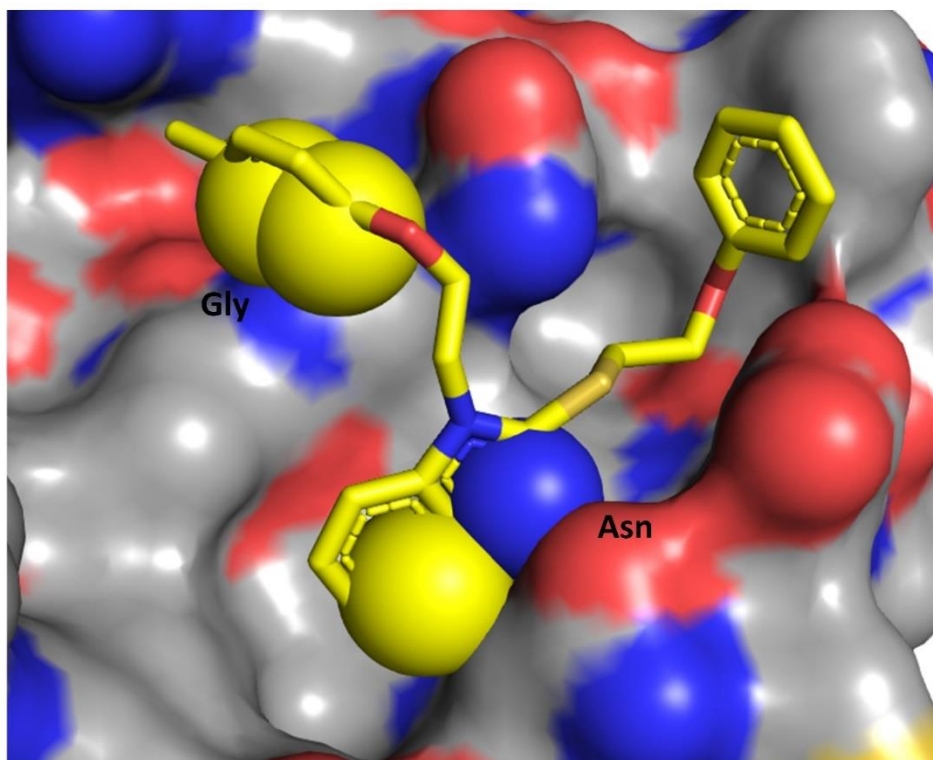

**Figure S1: Interatomic 'Bad' clashes between four ligand atoms of L4 and two protein residues (Gly and Asn).** Five steric clashes between four ligand atoms and two protein residues are observed with atomic overlaps: 0.696, 0.704, 0.772, 0.604, and 0.585.

**(A)**

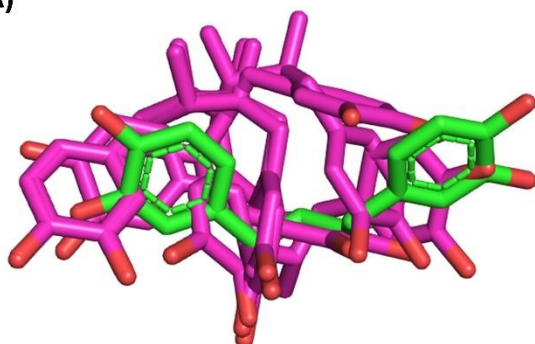

**(B)**

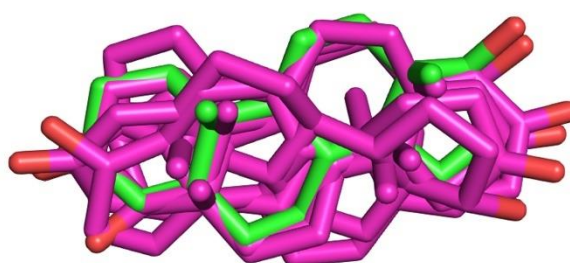

**Figure S2: Superposition of re-docked (magenta) poses of ligands on their respective bound pose (green) reported in C1. (A) L1 and (B) L'. This is a representative example. Similar results have been observed for the other structures discussed in case study-1 (section 2.3.1).**
